# Supplementary material for: The Effect of Tree Width on Thoracolumbar and Limb Kinematics, Saddle Pressure Distribution, and Thoracolumbar Dimensions in Sports Horses in Trot and Canter
Source: PubMed Central journal article supplement (PMC6827167; doi:10.3390/ani9100842), 2019-10-21
Supplement: animals-09-00842-s001.pdf [file animals-09-00842-s001.pdf]

## Supplementary Material

**Table S1.** - Translational IMU kinematic data whilst trotting for each saddle condition, correct, narrow and wide. Significance level set at  $p \leq 0.05$  with a Bonferroni post hoc correction to determine pairwise significance between conditions with only significant post hoc results being presented (Bonferroni adjusted alpha 5%). (DV = dorsoventral ROM, ML= mediolateral ROM, CC = craniocaudal ROM).

|                                    | Saddle Condition | T5<br>Mean $\pm$ SD<br>(mm) | T13<br>Mean $\pm$ SD<br>(mm)                     | T18<br>Mean $\pm$ SD<br>(mm) | L3<br>Mean $\pm$ SD<br>(mm) | TS<br>Mean $\pm$ SD<br>(mm) |
|------------------------------------|------------------|-----------------------------|--------------------------------------------------|------------------------------|-----------------------------|-----------------------------|
| DV                                 | Correct          | 71.86 $\pm$ 10.3            | 95.3 $\pm$ 9.3                                   | 97.0 $\pm$ 11.1              | 91.7 $\pm$ 10.7             | 86.5 $\pm$ 11.1             |
| DV                                 | Narrow           | 72.91 $\pm$ 11.3            | 90.9 $\pm$ 11.7                                  | 96.0 $\pm$ 10.6              | 92.7 $\pm$ 12.6             | 87.2 $\pm$ 1.8              |
| DV                                 | Wide             | 73.00 $\pm$ 1.1             | 92.6 $\pm$ 11.6                                  | 95.0 $\pm$ 11.2              | 91.2 $\pm$ 11.4             | 86.4 $\pm$ 11.1             |
| P-value                            |                  | 0.62                        | <b>0.003</b>                                     | 0.62                         | 0.35                        | 0.53                        |
| <i>Bonferroni post hoc P-value</i> |                  | -                           | correct – narrow, 0.004                          | -                            | -                           | -                           |
| ML                                 | Correct          | 28.82 $\pm$ 4.8             | 19.6 $\pm$ 5.4                                   | 29.6 $\pm$ 8.5               | 26.8 $\pm$ 5.0              | 37.5 $\pm$ 7.9              |
| ML                                 | Narrow           | 27.5 $\pm$ 4.9              | 21.0 $\pm$ 5.6                                   | 28.5 $\pm$ 9.1               | 28.9 $\pm$ 7.2              | 37.2 $\pm$ 8.3              |
| ML                                 | Wide             | 29.2 $\pm$ 7.2              | 17.8 $\pm$ 5.2                                   | 28.7 $\pm$ 8.8               | 29.9 $\pm$ 6.0              | 36.5 $\pm$ 8.1              |
| P-value                            |                  | 0.16                        | <b>0.001</b>                                     | 0.78                         | 0.08                        | 0.48                        |
| <i>Bonferroni post hoc P-value</i> |                  | -                           | correct – wide, 0.02.<br>correct – narrow, 0.004 | -                            | -                           | -                           |
| CC                                 | Correct          | 32.9 $\pm$ 7.4              | 27.6 $\pm$ 4.6                                   | 18.3 $\pm$ 4.4               | 14.2 $\pm$ 3.0              | 15.1 $\pm$ 3.2              |
| CC                                 | Narrow           | 31.9 $\pm$ 7.3              | 28.5 $\pm$ 5.1                                   | 18.5 $\pm$ 4.3               | 14.3 $\pm$ 3.7              | 15.0 $\pm$ 3.8              |
| CC                                 | Wide             | 34.0 $\pm$ 7.5              | 28.8 $\pm$ 4.1                                   | 16.6 $\pm$ 3.2               | 14.2 $\pm$ 4.0              | 15.1 $\pm$ 3.3              |
| P-value                            |                  | <b>0.02</b>                 | 0.31                                             | 0.08                         | 0.98                        | 0.97                        |
| <i>Bonferroni post hoc P-value</i> |                  | narrow – wide, 0.01         | -                                                | -                            | -                           | -                           |

**Table S2.** –Rotational IMU kinematic data whilst trotting for each saddle condition, correct, narrow and wide. Significance level set at  $p < 0.05$  with a Bonferroni post hoc correction to determine pairwise significance between conditions with only significant post hoc results being presented (Bonferroni adjusted alpha 5%). (FE=Flexion-Extension, AR = Axial Rotation, LB = Lateral Bending).

|                                    | Saddle Condition | T5<br>Mean ± SD<br>(°) | T13<br>Mean ± SD<br>(°) | T18<br>Mean ± SD<br>(°) | L3<br>Mean ± SD<br>(°) | TS<br>Mean ± SD<br>(°) |
|------------------------------------|------------------|------------------------|-------------------------|-------------------------|------------------------|------------------------|
| FE                                 | Correct          | 6.43 ± 2.3             | 7.50 ± 3.3              | 3.79 ± 1.0              | 5.20 ± 0.7             | 4.25 ± 1.0             |
| FE                                 | Narrow           | 6.05 ± 2.3             | 5.19 ± 2.4              | 2.96 ± 1.2              | 4.31 ± 0.8             | 3.10 ± 1.2             |
| FE                                 | Wide             | 6.93 ± 1.8             | 6.08 ± 1.4              | 3.62 ± 0.7              | 5.00 ± 0.9             | 4.18 ± 0.7             |
| P-value                            |                  | 0.81                   | <b>0.03</b>             | 0.42                    | 0.67                   | 0.66                   |
| <i>Bonferroni post hoc P-value</i> |                  | -                      | correct – narrow, 0.04  | -                       | -                      | -                      |
| AR                                 | Correct          | 16.94 ± 3.3            | 11.64 ± 3.2             | 7.69 ± 1.0              | 9.41 ± 2.4             | 20.94 ± 0.9            |
| AR                                 | Narrow           | 15.27 ± 3.1            | 13.14 ± 2.9             | 8.57 ± 1.2              | 8.79 ± 2.4             | 21.66 ± 0.9            |
| AR                                 | Wide             | 15.60 ± 5.6            | 10.09 ± 4.0             | 6.96 ± 0.7              | 8.42 ± 2.7             | 16.16 ± 1              |
| P-value                            |                  | <b>0.04</b>            | <b>0.03</b>             | 0.88                    | <b>0.03</b>            | 0.08                   |
| <i>Bonferroni post hoc P-value</i> |                  | -                      | correct – narrow, 0.04  | -                       | -                      | -                      |
| LB                                 | Correct          | 8.21 ± 1.4             | 7.2 ± 2.0               | 5.9 ± 1.9               | 5.06 ± 1.7             | 5.7 ± 1.9              |
| LB                                 | Narrow           | 7.82 ± 0.9             | 7.1 ± 2.0               | 5.9 ± 2.2               | 5.05 ± 1.2             | 5.9 ± 2.2              |
| LB                                 | Wide             | 6.67 ± 1.4             | 6.2 ± 2.1               | 6.8 ± 3.22              | 4.06 ± 1.0             | 4.3 ± 0.9              |
| P-value                            |                  | 0.22                   | 0.54                    | 0.22                    | 0.89                   | 0.33                   |
| <i>Bonferroni post hoc P-value</i> |                  | -                      | -                       | -                       | -                      | -                      |

**Table S3 – Displaying IMU kinematic data whilst cantering for each saddle condition, correct, narrow and wide.** Significance level set at  $p \leq 0.05$  a Bonferroni post hoc correction to determine pairwise significance between conditions with only significant post hoc results being presented (Bonferroni adjusted alpha 5%). (DV = dorsoventral ROM, ML= mediolateral ROM, CC = craniocaudal ROM).

|  | Saddle Condition | T5<br>Mean ± SD | T13<br>Mean ± SD | T18<br>Mean ± SD | L3<br>Mean ± SD | TS<br>Mean ± SD |
|--|------------------|-----------------|------------------|------------------|-----------------|-----------------|
|--|------------------|-----------------|------------------|------------------|-----------------|-----------------|

|                                      |         | (mm)         | (mm)          | (mm)         | (mm)         | (mm)         |
|--------------------------------------|---------|--------------|---------------|--------------|--------------|--------------|
| DV                                   | Correct | 185.4 ± 18.8 | 216.3 ± 12.8  | 207.1 ± 23.4 | 196.5 ± 37.0 | 193.5 ± 21.0 |
| DV                                   | Narrow  | 167.0 ± 36.7 | 200.0 ± 42.1  | 194.9 ± 40.2 | 190.7 ± 49.5 | 181.3 ± 36.7 |
| DV                                   | Wide    | 165.3 ± 49.7 | 186.42 ± 49.8 | 192.9 ± 49.9 | 188.5 ± 49.5 | 178.7 ± 49.3 |
| P- value                             |         | 0.18         | 0.05          | 0.43         | 0.73         | 0.30         |
| <i>Bonferroni post hoc P - value</i> |         | -            | -             | -            | -            | -            |
| ML                                   | Correct | 51.3 ± 16.6  | 51.2 ± 7.67   | 73.8 ± 26.8  | 69.0 ± 22.9  | 55.6 ± 10.3  |
| ML                                   | Narrow  | 43.7 ± 10.2  | 44.5 ± 11.41  | 57.0 ± 13.63 | 54.0 ± 10.4  | 53.4 ± 10.0  |
| ML                                   | Wide    | 44.7 ± 12.7  | 58.4 ± 37.6   | 54.3 ± 15.03 | 55.0 ± 15.6  | 55.1 ± 12.9  |
| P - value                            |         | 0.31         | 0.31          | 0.05         | 0.05         | 0.81         |
| <i>Bonferroni post hoc P - value</i> |         | -            | -             | -            | -            | -            |
| CC                                   | Correct | 113.6 ± 16.7 | 104.4 ± 6.7   | 96.9 ± 24.0  | 112.0 ± 7.0  | 120.7 ± 5.3  |
| CC                                   | Narrow  | 109.9 ± 28.4 | 95.8 ± 23.8   | 98.6 ± 26.6  | 99.0 ± 26.8  | 107.7 ± 30.9 |
| CC                                   | Wide    | 106.5 ± 37.4 | 93.5 ± 34.5   | 94.7 ± 39.1  | 95.0 ± 38.0  | 104.5 ± 42.2 |
| P - value                            |         | 0.81         | 0.42          | 0.92         | 0.20         | 0.29         |
| <i>Bonferroni post hoc P - value</i> |         | -            | -             | -            | -            | -            |

**Table S4.** - Displaying IMU kinematic data whilst cantering for each saddle condition, correct, narrow and wide. Significance level set at  $p \leq 0.05$  with a Bonferroni post hoc correction to determine pairwise significance between conditions with only significant post hoc results being presented (Bonferroni adjusted alpha 5%). (FE=flexion-extension, AR = Axial Rotation, LB = Lateral Bending).

| Thoracolumbar Spine Rotations | Saddle Condition | T5            | T13           | T18           | L3            | TS            |
|-------------------------------|------------------|---------------|---------------|---------------|---------------|---------------|
|                               |                  | Mean ± SD (°) | Mean ± SD (°) | Mean ± SD (°) | Mean ± SD (°) | Mean ± SD (°) |
| FE                            | Correct          | 15.6 ± 1.9    | 9.2 ± 1.73    | 14.8 ± 6.3    | 12.2 ± 1.5    | 14.3 ± 1.8    |
| FE                            | Narrow           | 14.8 ± 4.3    | 9.6 ± 2.31    | 11.7 ± 3.2    | 12.1 ± 2.5    | 13.4 ± 2.8    |
| FE                            | Wide             | 13.4 ± 4.0    | 9.0 ± 6.72    | 11.1 ± 3.6    | 12.5 ± 3.8    | 13.2 ± 3.6    |

|                                      |         |                      |                      |                      |                      |            |
|--------------------------------------|---------|----------------------|----------------------|----------------------|----------------------|------------|
| P - value                            |         | 0.30                 | 0.61                 | 0.03                 | 0.90                 | 0.53       |
| <i>Bonferroni post hoc P - value</i> |         | -                    | -                    | correct – wide, 0.04 | -                    |            |
| AR                                   | Correct | 13.4 ± 4.4           | 12.1 ± 2.9           | 20.5 ± 5.2           | 16.5 ± 2.8           | 13.3 ± 3.1 |
| AR                                   | Narrow  | 13.8 ± 2.9           | 10.9 ± 3.4           | 20.7 ± 6.0           | 14.1 ± 2.9           | 13.2 ± 3.3 |
| AR                                   | Wide    | 16.2 ± 3.7           | 8.9 ± 2.6            | 20.2 ± 6.0           | 14.0 ± 3.6           | 14.1 ± 2.5 |
| P - value                            |         | 0.02                 | 0.01                 | -                    | 0.007                | 0.11       |
| <i>Bonferroni post hoc P - value</i> |         | correct - wide, 0.03 | correct – wide, 0.04 |                      | correct – wide, 0.03 |            |
| LB                                   | Correct | 8.9 ± 3.8            | 6.2 ± 1.5            | 10.9 ± 4.9           | 7.3 ± 3.0            | 6.6 ± 2.2  |
| LB                                   | Narrow  | 7.7 ± 1.2            | 6.1 ± 1.6            | 7.9 ± 2.3            | 6.1 ± 1.6            | 6.4 ± 1.5  |
| LB                                   | Wide    | 9.0 ± 2.4            | 5.7 ± 1.4            | 9.0 ± 2.3            | 6.1 ± 2.4            | 6.0 ± 1.6  |
| P - value                            |         | 0.54                 | 0.72                 | 0.03                 | 0.32                 | 0.56       |
| <i>Bonferroni post hoc P - value</i> |         | -                    | -                    | -                    | -                    | -          |
